# Supplementary material for: A New Artificial Intelligence-Based Method for Identifying Mycobacterium Tuberculosis in Ziehl–Neelsen Stain on Tissue
Source: MDPI journal article supplement (doi:10.3390/diagnostics12061484), 2022-06-17
Supplement: s1 [file s1]

**Table S1.** Processing protocol for automatic tissue processor Leica ASP 200S.

| No. | Reagent      | Time       | Temperature | Pressure/ Vacuum | Time of Draining |
|-----|--------------|------------|-------------|------------------|------------------|
| 1.  | water        | 10 minutes | -           | P/V              | 80 sec.          |
| 2.  | Ethanol 70°  | 1½ h       | 40°C        | P/V              | 80 sec.          |
| 3.  | Ethanol 80°  | 1¾ h       | 40°C        | P/V              | 80 sec.          |
| 4.  | Ethanol 96°  | 1¾ h       | 40°C        | P/V              | 80 sec.          |
| 5.  | Ethanol 100° | 1 h        | 40°C        | P                | 80 sec.          |
| 6.  | Ethanol 100° | 1½ h       | 40°C        | P/V              | 80 sec.          |
| 7.  | Ethanol 100° | 1½ h       | 40°C        | P/V              | 80 sec.          |
| 8.  | Xylene       | 2 h        | 52°C        | P                | 80 sec.          |
| 9.  | Xylene       | 2 h        | 52°C        | P                | 80 sec.          |
| 10. | Xylene       | 2 h        | 55°C        | P/V              | 80 sec.          |
| 11. | Paraffin     | 1 h        | 58°C        | P                | 80 sec.          |
| 12. | Paraffin     | 2 h        | 58°C        | P                | 80 sec.          |
| 13. | Paraffin     | 3 h        | 58°C        | P                | 80 sec.          |

**Table S2.** Processing protocol for automatic tissue processor Leica Peloris 2.

| No. | Reagent      | Time    | Temperature | Pressure/ Vacuum | Time of Draining |
|-----|--------------|---------|-------------|------------------|------------------|
| 1.  | Formalin 10% | 44 min  | 45°C        | P                | 10 sec           |
| 2.  | Ethanol 100° | 30 min  | 45°C        | P                | 10 sec           |
| 3.  | Ethanol 100° | 60 min  | 45°C        | P                | 10 sec           |
| 4.  | Ethanol 100° | 60 min  | 45°C        | P                | 10 sec           |
| 5.  | Ethanol 100° | 60 min  | 45°C        | P                | 10 sec           |
| 6.  | Ethanol 100° | 90 min  | 45°C        | P                | 10 sec           |
| 7.  | Ethanol 100° | 90 min  | 45°C        | P                | 10 sec           |
| 8.  | Xylene       | 75 min  | 45°C        | P                | 10 sec           |
| 9.  | Xylene       | 75 min  | 45°C        | P                | 10 sec           |
| 10. | Xylene       | 210 min | 45°C        | P                | 10 sec           |
| 11. | Paraffin     | 120 min | 60°C        | V                | 10 sec           |
| 12. | Paraffin     | 180 min | 60°C        | V                | 10 sec           |
| 13. | Paraffin     | 180 min | 60°C        | V                | 10 sec           |

**Table S3.** Protocol for Ziehl Nielsen stain.

|                                                                                                    |
|----------------------------------------------------------------------------------------------------|
| 1. Bring section to distilled water.                                                               |
| 2. Carbolfuchsin solution - 10 minute; heat with open flame beneath the slide until vapor emission |
| 3. Wash in tap water.                                                                              |
| 4. Decolorizing solution (Acid differentiation buffer) – 1-2 seconds                               |
| 5. Wash in tap water.                                                                              |
| 6. Methylene blue solution 1% – 30 seconds                                                         |
| 7. Wash in tap water.                                                                              |
| 8. Dehydrate through alcohol, xylene and mount                                                     |

**Table S4.** Experience of pathologists performing annotations.

| Pathologist | Grade                                           | Years of Expertise as Certified Pathologist |
|-------------|-------------------------------------------------|---------------------------------------------|
| SZ          | Senior pathologist, PhD, professor of pathology | 23                                          |
| CP          | Senior pathologist, PhD                         | 12                                          |
| LN          | Senior pathologist, PhD, lecturer               | 14                                          |
| MiC         | Senior pathologist, PhD student                 | 7                                           |
| LS          | Senior pathologist, PhD student                 | 9                                           |

|           |                          |   |
|-----------|--------------------------|---|
| <b>AC</b> | Pathologist, PhD student | 4 |
| <b>MB</b> | Pathologist              | 4 |

**Table S5.** Componence of teams of pathologists involved in testing process.

| Team of Pathologists | Years of Experience |
|----------------------|---------------------|
| LN, CP               | 11-15               |
| LS, MC               | 6-10                |
| AC, MB               | 1-5                 |
| OS, IT               | residents           |

**Table S6.** Performance metrics used to evaluate our proposed method.

| Performance Metrics       | Formula                           | Equivalent      |
|---------------------------|-----------------------------------|-----------------|
| Sensitivity               | $TP / (FN + TP)$                  |                 |
| Specificity               | $TN / (FP + TN)$                  |                 |
| Precision                 | $TP / (TP + FP)$                  |                 |
| Negative predictive value | $TN / (FN + TN)$                  |                 |
| False negative rate       | $FN / (TP + FN)$                  | 1 – sensitivity |
| False positive rate       | $FP / (FP + TN)$                  | 1 – specificity |
| Accuracy                  | $(TP + TN) / (TP + TN + FP + FN)$ |                 |
| F1                        | $2TP / (2TP + FP + FN)$           |                 |

TP – true positive, TN – true negative, FP – false positive, FN – false negative.

**Table S7.** Errors in WSIs evaluation for qualified pathologists.

| Qualified Pathologists (6 Persons x 60 WSI) |   |                |                |        |
|---------------------------------------------|---|----------------|----------------|--------|
|                                             |   | Negative cases | Positive cases | total  |
| No of errors per WSI                        | 0 | 29             | 10             | 39     |
|                                             | 1 | 4              | 6              | 10     |
|                                             | 2 | 1              | 6              | 7      |
|                                             | 3 | 2              | 0              | 2      |
|                                             | 4 | 1              | 1              | 2      |
|                                             | 5 | 0              | 0              | 0      |
|                                             | 6 | 0              | 0              | 0      |
| cases with errors (of 60 WSIs)              |   | 8              | 13             | 21     |
| %                                           |   | 21.62%         | 56.52%         | 35.00% |
| No of errors (of 360 examinations)          |   | 16             | 22             | 38     |
| %                                           |   | 7.21%          | 15.94%         | 10.56% |

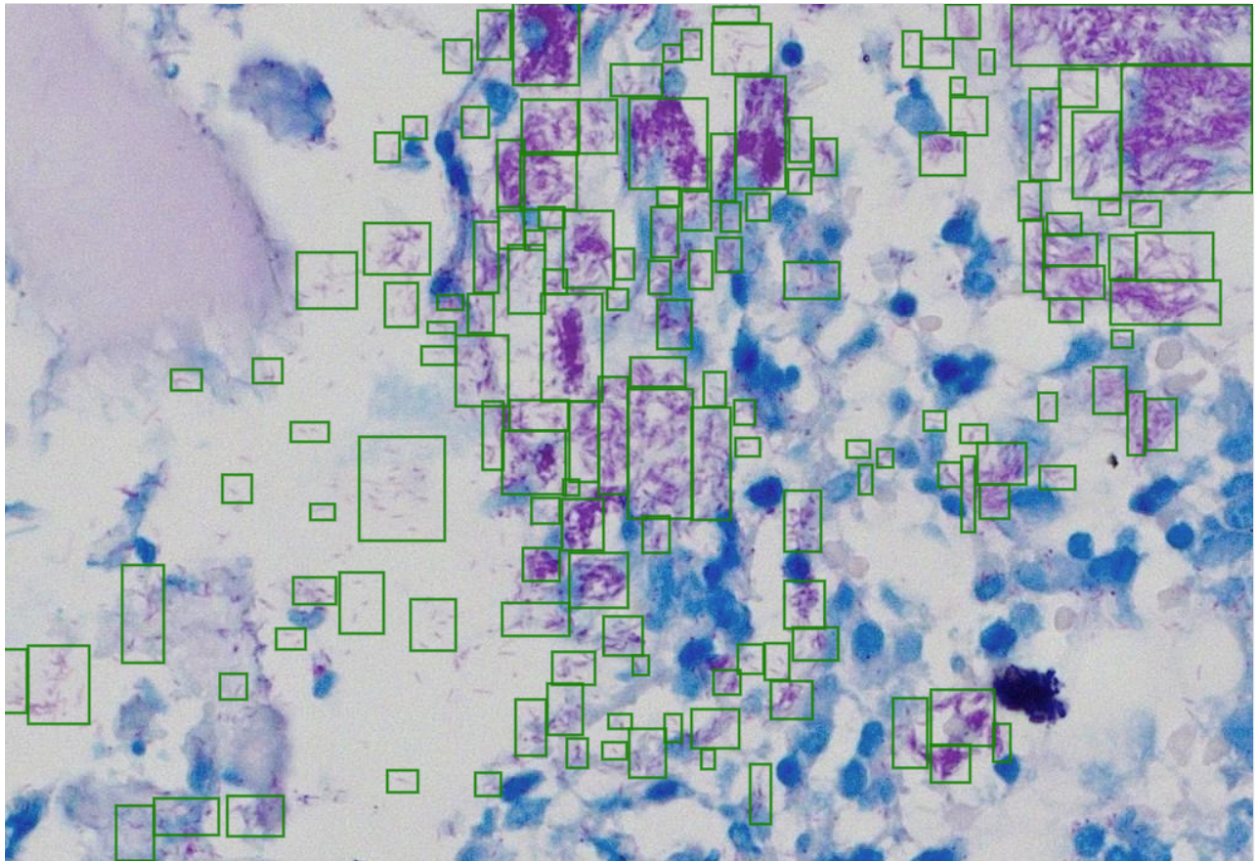

**Figure S1.** Annotation of AFB in in-house platform with green boxes encircling small groups of bacilli. ZN x 400.

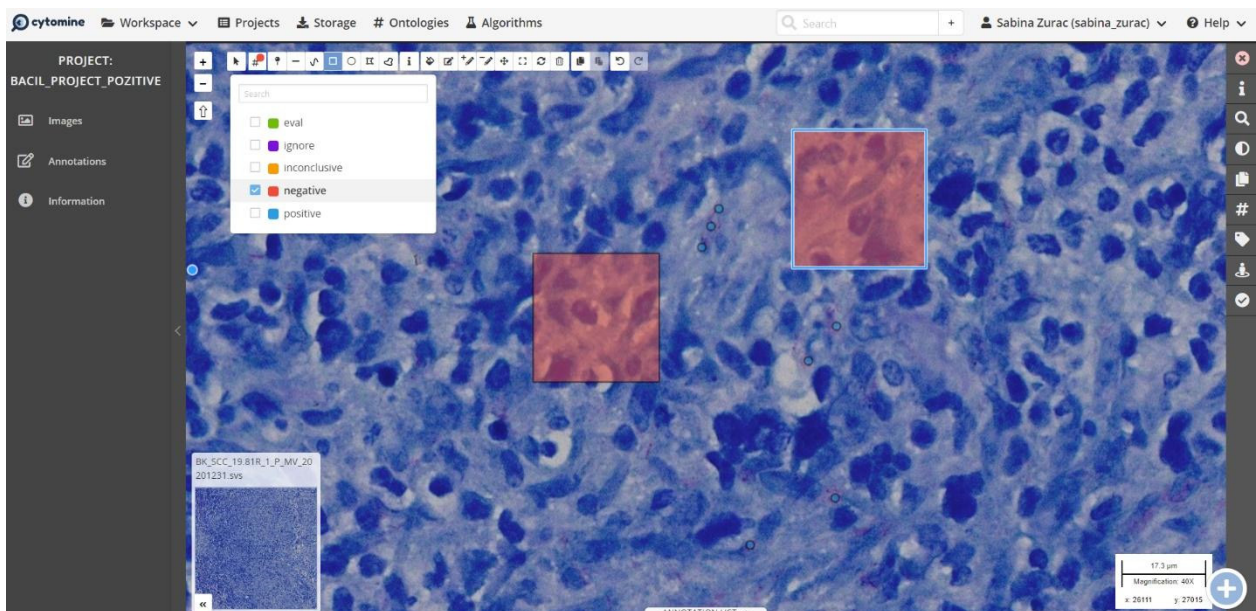

**Figure S2.** Annotation of AFB in Cytomine platform with blue dots on top of the bacilli and negative red square areas. Tuberculous lymphadenitis with very few bacilli. ZN x 400.



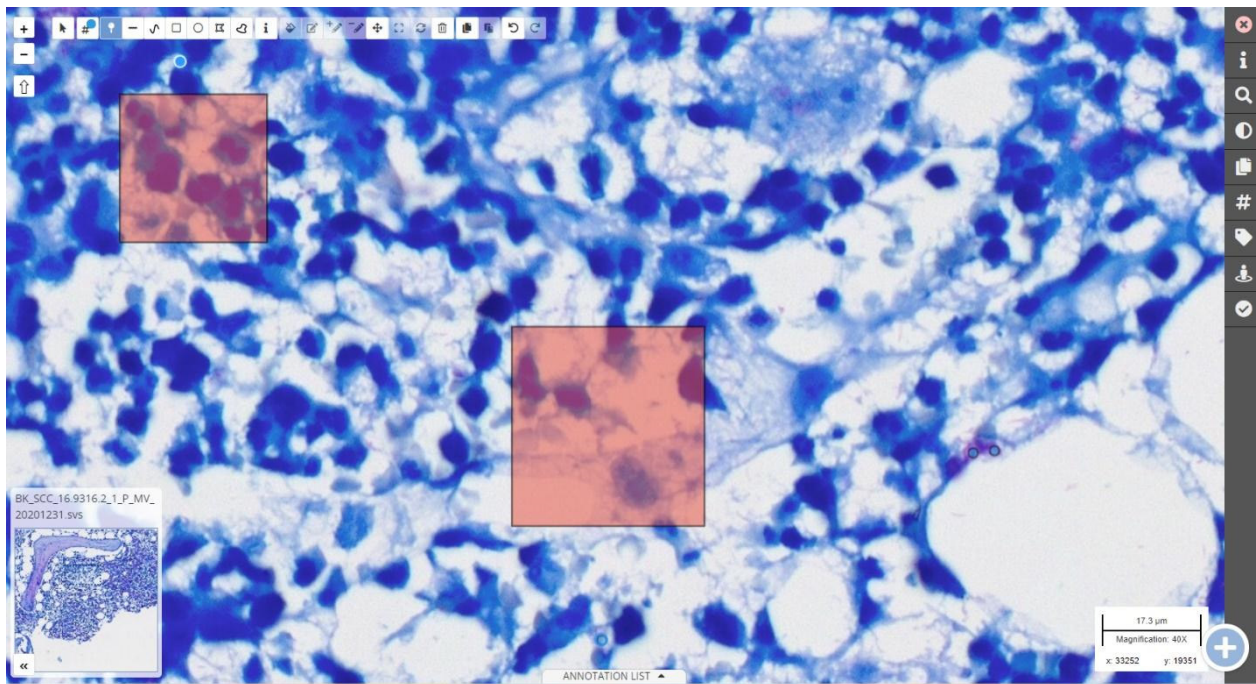

**Figure S3.** Annotation of AFB in Cytomine platform with blue dots on top of the bacilli and negative red square areas. Bone marrow with variable distribution of AFB. ZN x 400.

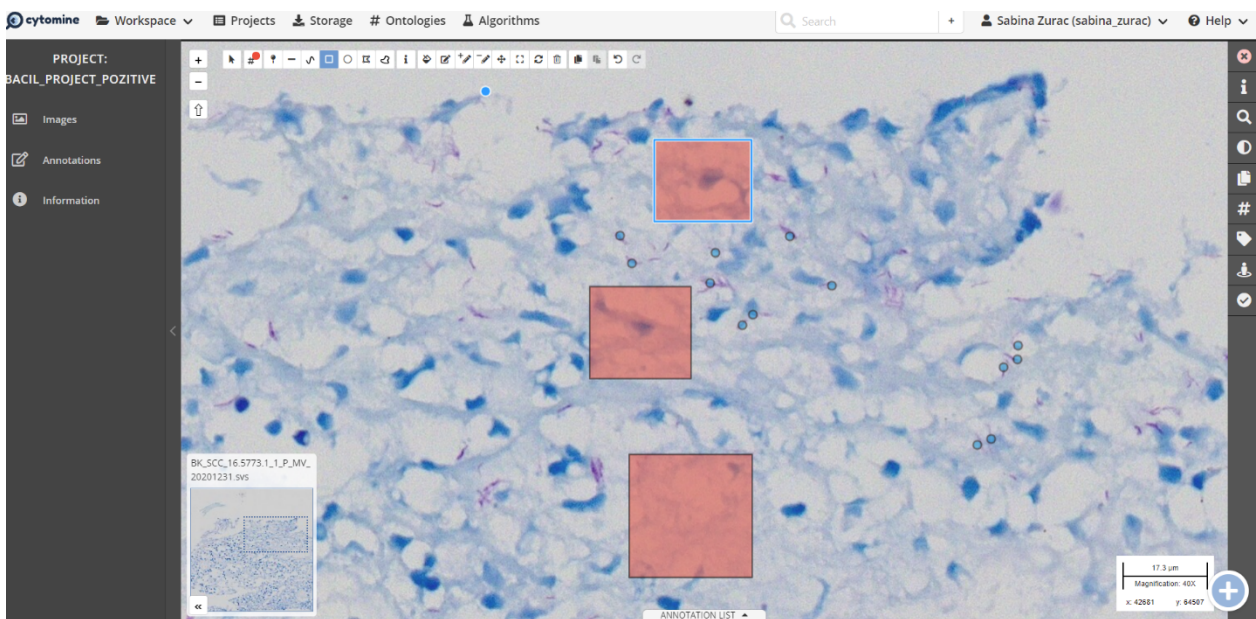

**Figure S4.** Annotation of AFB in Cytomine platform with blue dots on top of the bacilli and negative red square areas. Case with numerous AFB. ZN x 400.



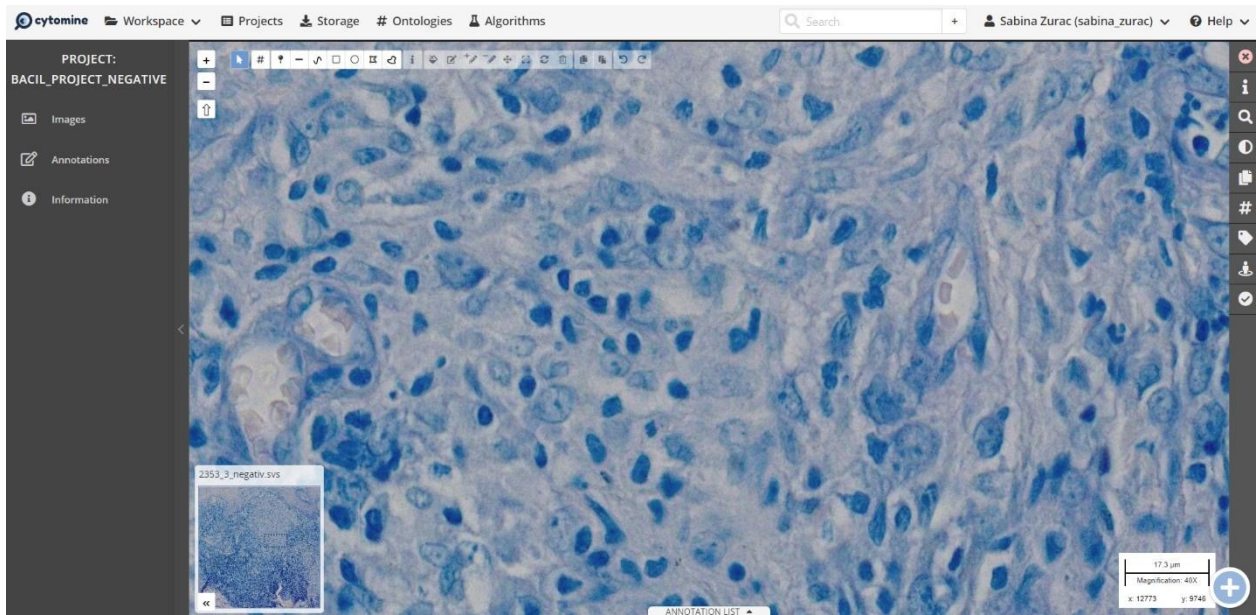

**Figure S5.** Negative case – granulation tissue. ZN x 400.

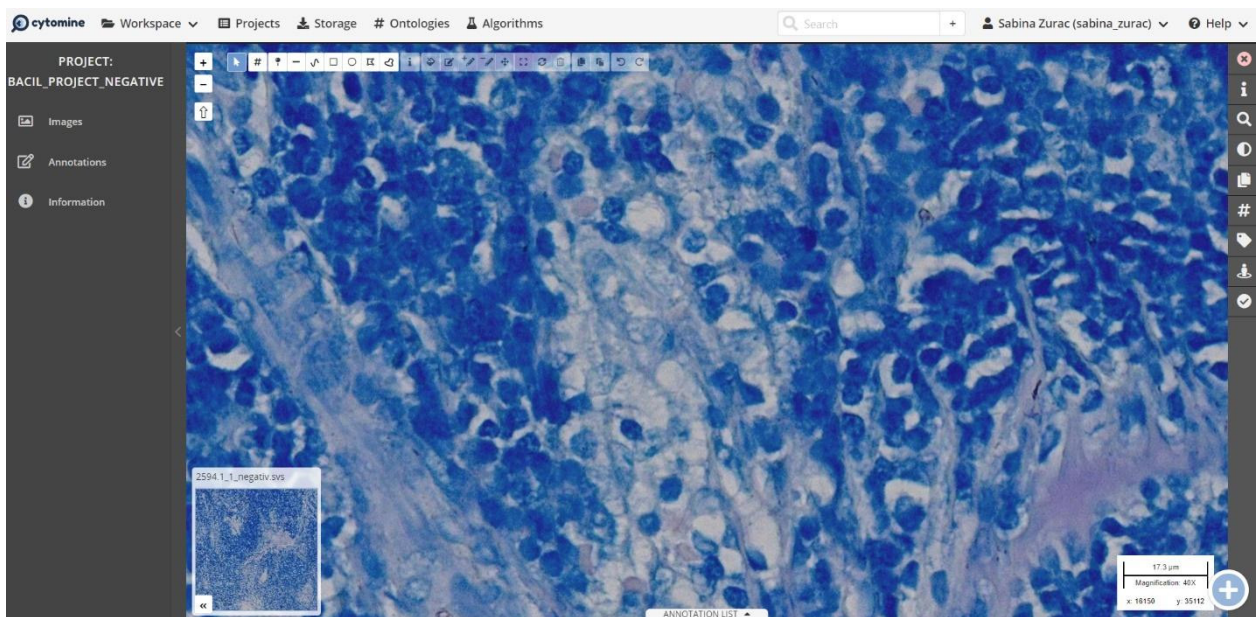

**Figure S6.** Negative case – reactive lymphadenitis with sinusal histiocytosis. ZN x 400.
